# Supplementary material
Source: PubMed Central journal article supplement (PMC6904803)
Supplement: mmc1.pdf [file mmc1.pdf]

YMTHE, Volume 27

## Supplemental Information

### **A Cohesin-Mediated Intrachromosomal Loop Drives**

### **Oncogenic *ROR* lncRNA to Accelerate Tumorigenesis**

**Jiayan Fan, Yangfan Xu, Xuyang Wen, Shengfang Ge, Renbing Jia, He Zhang, and Xianqun Fan**

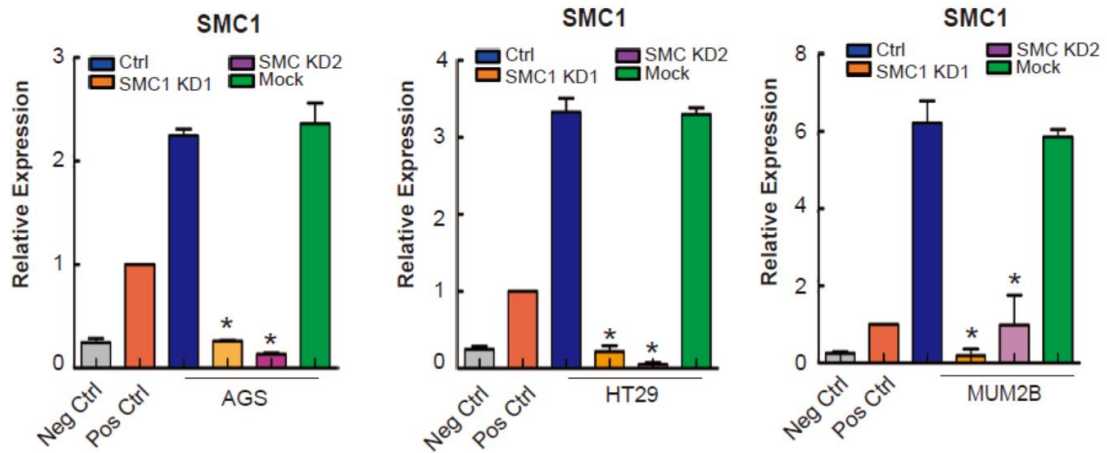

**Figure S1. Validation of two shRNA mediated knockdowns of SMC1**

Real-time PCR demonstrating that shRNA efficiently silenced *SMC1* at the RNA expression level in AGS, HT29 and MUM2B cells. \*P<0.05: compared with the control (ctrl) and mock. Mock: empty pGIPZ vector. 293T cell and fibroblast used as positive and negative control respectively.

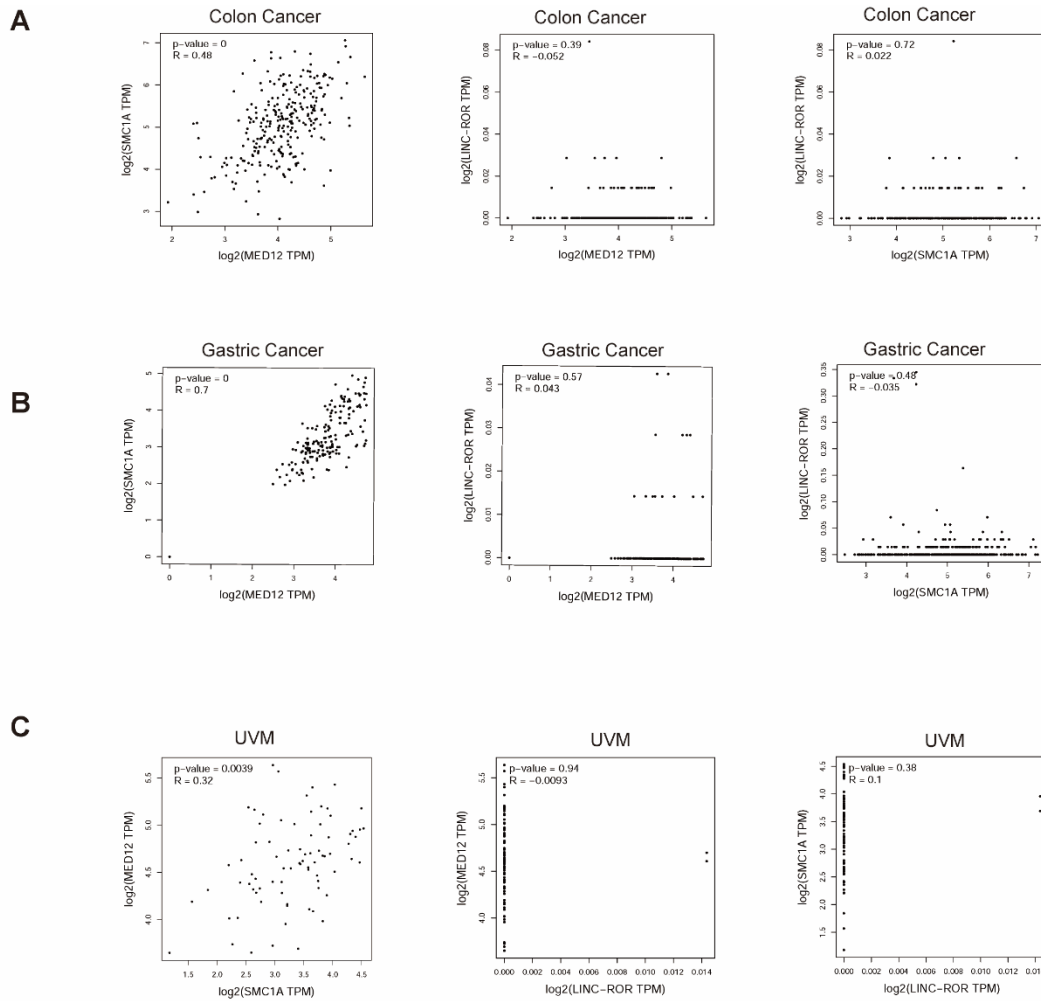

**Figure S2. Pearson correlation between *ROR* and the epigenetic regulators (*SMC1* and *MED12*) mRNA expression in the GEPIA dataset.**

Gene expression analysis using the GEPIA dataset validated the positive correlation between *SMC1* and *MED12* in colon cancer, gastric cancer and uveal melanoma (UVM). But there was no correlation between the expression of *SMC1* and *MED12* with *ROR* lncRNA.

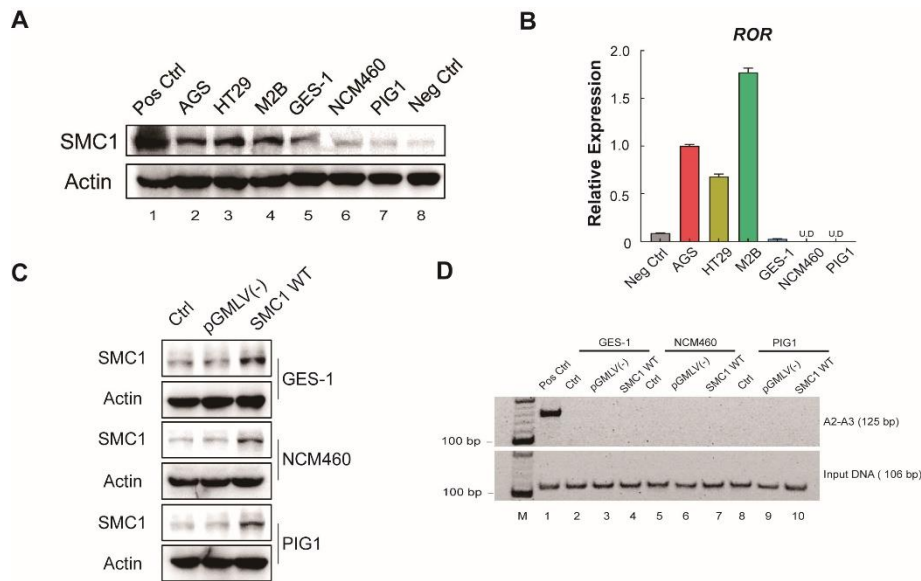

**Figure S3. Rescue study of *SMC1* in low *ROR* expression cells**

**A.** *SMC1* expression in different tumors were measured by Western blot. *SMC1* presented higher expression in a series of tumor cells than in three normal cells (NCM460, GES-1 and PIG1). 293T cell: positive control. Fibroblast: negative controls.

**B.** Real-time PCR showed *ROR* expression in tumors and normal cells. There was almost no expression of *ROR* in three normal cells (NCM460, GES-1 and PIG1). Fibroblast was used as negative controls.

**C.** The protein levels of *SMC1* in the normal cells treated with wild-type *SMC1* and empty vector were measured with Western blotting. *SMC1* was overexpression in the presence of the overexpressed wild-type *SMC1*. *SMC1* WT: *SMC1* ORF was cloned into pGMLV plasmids for stable expression. pGMLV(-): empty pGIPZ vector.

**D.** Chromosome conformation capture (3C) detected the intrachromosomal loop in the normal cells treated with wild-type *SMC1*. The cohesin-orchestrated intrachromosomal looping was not restored in the *SMC1* overexpression cells. MUM2B cell was used as a positive control.

**Table S1. Primers for 3C**

| <b>Primer</b> | <b>Sequence (5'-3')</b>      |
|---------------|------------------------------|
| P1A           | TAACAGAACCATCAGCCCTGAATGTC   |
| P1B           | ACCATCAGCCCTGAATGTCCCCCTACT  |
| P2A           | TGCAAAGAGCTGGCCAGAGGCATC     |
| P2B           | TGGCCAGAGGCATCCTGGCAGT       |
| P3A           | TGATCCACTGGTCAGATCCCAGGTC    |
| P3B           | ACTGGTCAGATCCCAGGTCTCATGACTC |
| P4A           | TTCTGACACACCTCCAGTGGATCTG    |
| P4B           | TCCAGTGGATCTGGGCGCACTCCAG    |
| P5A           | GATGACCAGTGGCCCTGGAGGTC      |
| P5B           | GCCCTGGAGGTCCCAAAGGTCAAAGATG |
| P6A           | TGTGCATTAATTCCAACCACCTGCTC   |
| P6B           | TAATTCCAACCACCTGCTCTGTGGAGC  |
| R1            | TCAGCTGTCACTCAGCCACAGTG      |
| R2            | CAGTGAGAGGATGAACACCTCGCA     |

**Table S2. Primers for ChIP and qRT-PCR**

| <b>Gene</b>             | <b>Primer Sequence (5'-3')</b> | <b>Purpose</b> |
|-------------------------|--------------------------------|----------------|
| <i>ROR</i> - pro1F (L1) | ACCACTCATTGTTGGCGCATTCCTG      | ChIP           |
| <i>ROR</i> - pro1R (L2) | GTACTCTTCCCACCCCTACTGCCA       | ChIP           |
| <i>ROR</i> -pro2F (L3)  | AGCGCCCTTAAGCAGGGTCATTC        | ChIP           |
| <i>ROR</i> -pro2R (L4)  | CTGTGCTCGCTCCCTTGGGAG          | ChIP           |
| <i>ROR</i> -pro3F (L5)  | CAGATCCCAGGTCTCATGACTCCCAG     | ChIP           |
| <i>ROR</i> -pro3R (L6)  | GCACAATGGCACTGCAGCACTGT        | ChIP           |
| SMC1-F                  | AGAGGTTACCGCCATCATTGGAC        | qRT-PCR        |
| SMC1-R                  | CACAGGAGCTCCATGGATCAGGTC       | qRT-PCR        |
| <i>ROR</i> -F           | CTTGGCTTAGCGGCTGAAGACTGACG     | qRT-PCR        |
| <i>ROR</i> -R           | TGGCCATGCACCAGGTAGAAATCTGTAG   | qRT-PCR        |

**Table S3. Primers for enhancer cloning and RNAi**

| <b>Gene</b>            | <b>shRNA CN / Primer Sequence (5'-3')</b> |
|------------------------|-------------------------------------------|
| <i>Smc1a</i>           | H4 (V3LHS_637850)                         |
| <i>Smc1a</i>           | H10 (V3LHS_637855)                        |
| <i>ROR</i> -Enhancer-F | <u>GGGTACCACAATCATTGAAAGCTTTCATG</u>      |
| <i>ROR</i> -Enhancer-R | <u>GCTCGAGCACTGGCTCAGGATAACTAG</u>        |

The underline indicated the restriction enzyme site. The CN indicated the catalog number of Open Biosystems.

**Table S4. Primers for MED12 RNAi**

| <b>Primer</b>      | <b>Sequence (5'-3')</b> |
|--------------------|-------------------------|
| si <i>MED12</i> -1 | CGCUGGUCUUUCGAUAAAUTT   |
| si <i>MED12</i> -2 | CCAGCACCUUUCACAUAUAUTT  |
| si <i>MED12</i> -3 | CCAGGGCUAUACUCCUUAUTT   |
| Negative Control   | UUCUCCGAACGUGUCACGUTT   |
